# Supplementary material for: Thickness effect on the ferroelectric properties of La-doped HfO2 epitaxial films down to 4.5 nm
Source: Royal Society of Chemistry journal article supplement (doi:10.1039/d1tc02512k), 2021-01-01
Supplement: d1tc02512k1.pdf [file d1tc02512k1.pdf]

## Electronic Supplementary Information

### Thickness effect on ferroelectric properties of La-doped HfO<sub>2</sub> epitaxial films down to 4.5 nm

Tingfeng Song,<sup>a</sup> Romain Bachelet,<sup>b</sup> Guillaume Saint-Girons,<sup>b</sup> Nico Dix,<sup>a</sup> Ignasi Fina,<sup>\*a</sup> and Florencio Sánchez<sup>\*a</sup>

<sup>a</sup> Institut de Ciència de Materials de Barcelona (ICMAB-CSIC), Campus UAB, Bellaterra 08193, Barcelona, Spain

<sup>b</sup> Univ. Lyon, Ecole Centrale de Lyon, INSA Lyon, Université Claude Bernard Lyon 1, CPE Lyon, CNRS, Institut des Nanotechnologies de Lyon - INL, UMR5270, 69134 Ecully, France.

\* ifina@icmab.es, fsanchez@icmab.es

### S1: XRD $2\theta$ - $\chi$ maps and $\theta$ - $2\theta$ scans of films on Si(001)

XRD  $2\theta$ - $\chi$  frames of the La:HfO<sub>2</sub> films on Si(001) (Figure S1a) show bright circular spots corresponding to the position of STO, the LSMO electrode, and the o-(111) reflection of La:HfO<sub>2</sub>. La:HfO<sub>2</sub> m-{002} reflections are detected in the films thicker than 9.2 nm and m-(-111) peak can be observed only in the thickest film. Instead to be circular, the spot is elongated along  $\chi$  direction. XRD  $\theta$ - $2\theta$  scans measured with point detector are shown in Figure S1b.

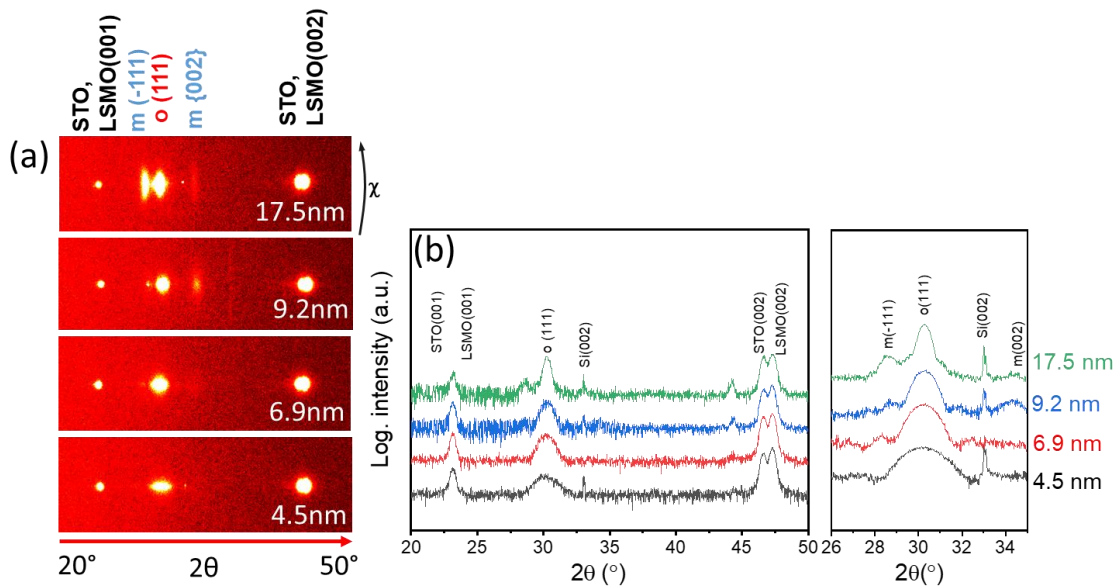

**Figure S1.** (a) XRD  $2\theta$ - $\chi$  frames of La:HfO<sub>2</sub> films on Si(001). The  $\chi$  range is from  $-10^\circ$  to  $10^\circ$ . (b) XRD  $\theta$ - $2\theta$  scans. Right panel: measurement with longer acquisition time around the main La:HfO<sub>2</sub> reflections.

## S2: XRD reciprocal space maps

Reciprocal space maps (RSM) around asymmetric  $\text{HfO}_2(331)$  and  $\text{HfO}_2(402)$  of the  $t = 4.5, 6.9$  and  $9.2$  nm films on  $\text{STO}(001)$  were measured (Figure S2). The  $\text{HfO}_2(331)$  reflections are close to the  $(113)$  reflections of  $\text{STO}$  and  $\text{LSMO}$  (here  $\text{LSMO}$  is indexed as pseudocubic). The  $\text{HfO}_2(402)$  reflection is close to the  $\text{LSMO}(1.5\ 1.5\ 2.5)$  reflection (there is not an equivalent reflection for  $\text{STO}$  due to its cubic symmetry). The  $Q_z$  axis in both RSM correspond to the  $\text{HfO}_2[111]$  direction, whereas the  $Q_x$  axis in  $\text{HfO}_2(331)$  and  $\text{HfO}_2(402)$  corresponds to  $\text{HfO}_2[11-2]$  and  $\text{HfO}_2[1-10]$  directions, respectively. The out of plane  $d_{[111]}$  parameter and the in-plane  $d_{[11-2]}$  and  $d_{[1-10]}$  parameters of the films, determined from the RSM, are indicated in Table S2-1.

The  $d_{[111]}$  parameters are in good agreement with the values determined more accurately from XRD symmetric scans (Figure 1c):  $2.977$  ( $t = 9.2$  nm film),  $2.987$  Å ( $t = 6.9$  nm film) and  $2.998$  Å ( $t = 4.5$  nm film). The in-plane parameters along the  $[11-2]\text{HfO}_2(111)$  and  $[1-10]\text{HfO}_2(111)$  directions are around  $2.11$  Å and  $3.58$  Å, respectively, without significant dependence on thickness. The corresponding values estimated from the calculated lattice constants for bulk orthorhombic  $\text{HfO}_2$  ( $\text{Pca}21$ )<sup>1</sup> are around  $2.08$  Å and  $3.61$  Å, respectively. The experimental values determined in our  $\text{La:HfO}_2$  films are thus close to the calculated values of relaxed undoped  $\text{HfO}_2$ . The relaxed crystal lattice, even in ultra-thin epitaxial  $\text{La:HfO}_2$  films, is indeed expected considering that  $\text{HfO}_2$  films grow epitaxially on  $\text{LSMO/STO}(001)$  by domain matching epitaxy mechanism.<sup>2</sup>

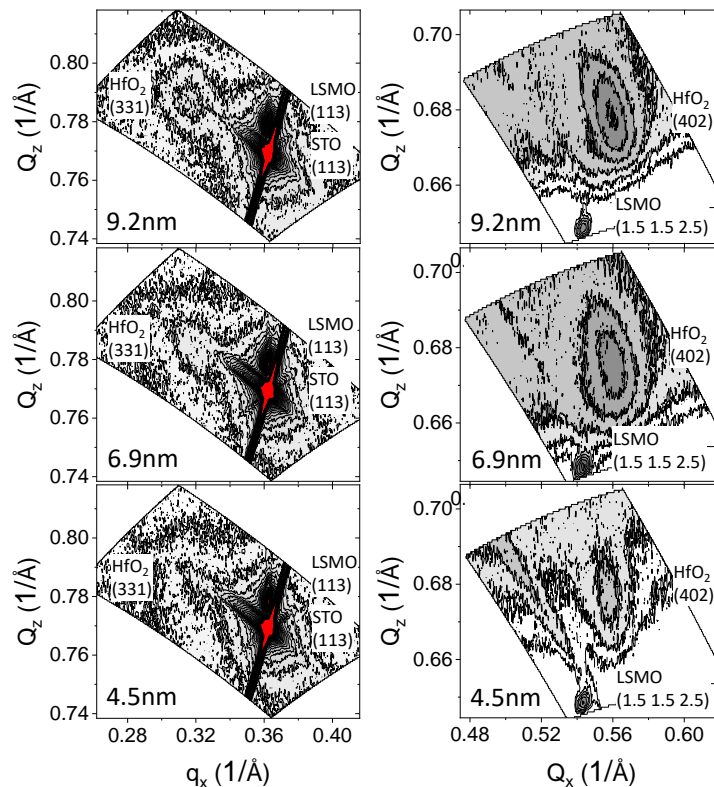

**Figure S2:** XRD reciprocal space maps around  $\text{HfO}_2(331)$  and  $\text{HfO}_2(402)$  reflections of  $\text{La:HfO}_2$  films of thickness (indicated in the bottom left of each panel)  $4.5, 6.9$  and  $9.2$  nm.

**Table S2-1:** out of plane  $d_{[111]}$  and in-plane  $d_{[11-2]}$  and  $d_{[1-10]}$  parameters, determined from the RSM around  $\text{HfO}_2(331)$  and  $\text{HfO}_2(402)$  reflections, of the  $t = 4.5, 6.9$  and  $9.2$  nm films on  $\text{STO}(001)$ .

| Thickness | $\text{HfO}_2(331)$ reflection |              | $\text{HfO}_2(402)$ reflection |              |
|-----------|--------------------------------|--------------|--------------------------------|--------------|
|           | $d_{[111]}$                    | $d_{[11-2]}$ | $d_{[111]}$                    | $d_{[1-10]}$ |
| 9.2 nm    | 2.97 Å                         | 2.11 Å       | 2.96 Å                         | 3.58 Å       |
| 6.9 nm    | 2.97 Å                         | 2.11 Å       | 2.97 Å                         | 3.58 Å       |
| 4.5 nm    | -                              | -            | 2.96 Å                         | 3.59 Å       |

### S3: The wake-up effect of films on STO substrate under lower voltage

Figure S3 shows current-voltage curves and polarization-voltage loops in pristine state and after 10 cycles of the films on  $\text{STO}(001)$ . The maximum applied voltage in each sample is smaller than that applied in Figure 4, and it can be observed that the wake-up effect is more pronounced.

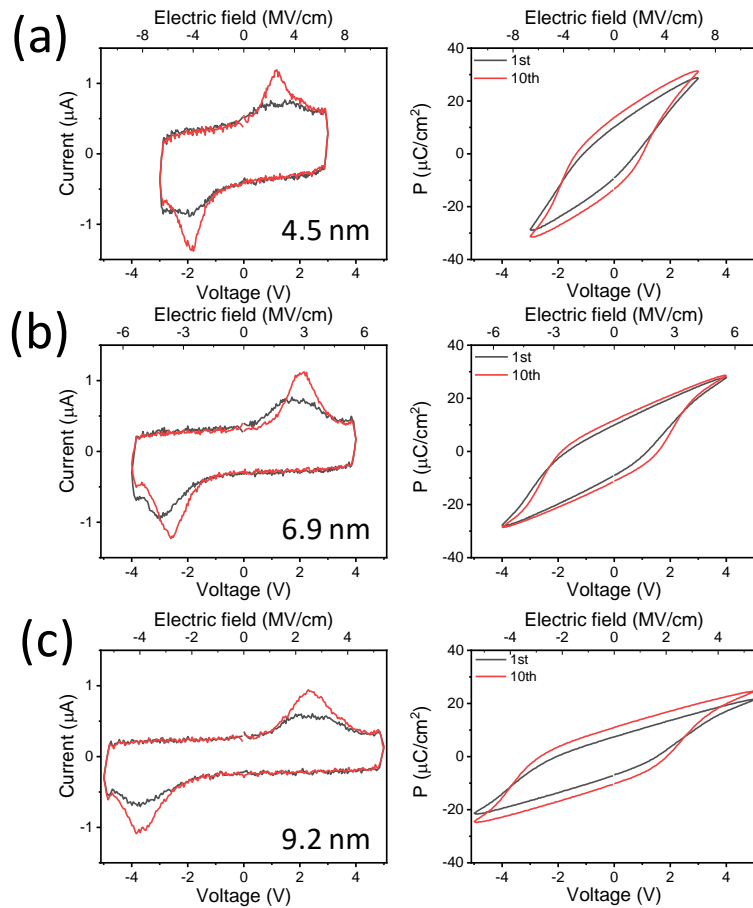

**Figure S3.** Current-voltage curves and polarization-voltage loops in pristine state and after 10 cycles of  $\text{La:HfO}_2$  films on  $\text{STO}(001)$  of thickness (a) 4.5 nm, (b) 6.9 nm, (c) 9.2 nm.

### S4: The wake-up effect of films on Si(001)

The current-voltage curves and polarization-voltage loops in pristine state and after a few cycles of films on Si(001) are shown in Figure S4. The clear multiple switching current peaks prove the wake-up effect in the 4.5 and 9.2 nm film. The wake-up effect is small and limited to the first cycle.

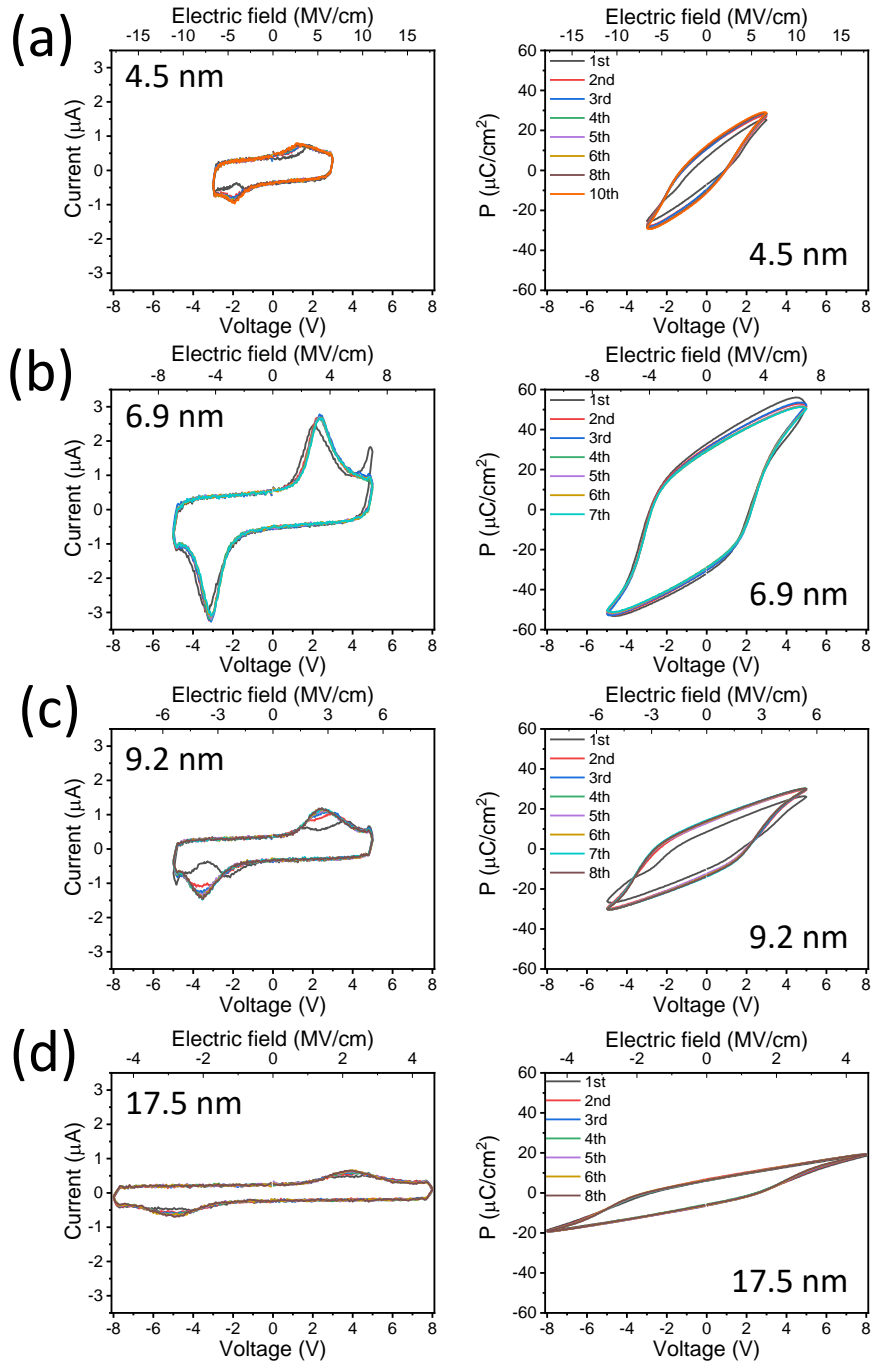

**Figure S4.** Evolution with the number of cycles of current - voltage curves and the corresponding polarization loops of La:HfO<sub>2</sub> films on Si(001) of thickness (a) 4.5 nm, (b) 6.9 nm, (c) 9.2 nm, and (d) 17.5 nm.

### S5: The leakage current of the films on Si(001)

Figure S5a shows leakage current curves of the films on Si(001). The leakage current is in the range from  $1 \times 10^{-6}$  A/cm<sup>2</sup> to  $1 \times 10^{-4}$  A/cm<sup>2</sup> at 2 MV/cm. The highest leakage current is in the 4.5 nm film and the 17.5 nm film shows the lowest leakage current. The dependences of the leakage current at 1 MV/cm and 2 MV/cm are presented in Figures S5b and S5c, respectively, for films on STO(001) (solid symbols) and Si(001) (empty symbols). It is evidenced that i) films on Si(001) are more leaky than films on STO(001) and ii) leakage does not decrease monotonically with increasing thickness as the  $t = 6.9$  nm films show low leakage. It is evident that leakage is expected to increase when thickness is reduced, but on the other hand, the relative amount of monoclinic phase increases with thickness, and the incoherent grain boundaries between monoclinic and orthorhombic phases are known to be current paths.<sup>3</sup> The combination of both factors affecting leakage cause the local minimum at a thickness of around 7 nm in the leakage - thickness graphs.

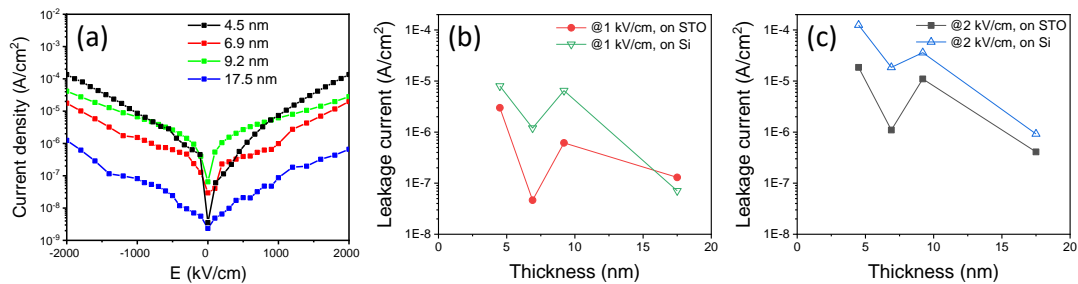

**Figure S5.** Leakage current curves of La:HfO<sub>2</sub> films on Si(001) (a). Dependence of the leakage current at 1 MV/cm (a) and 2 MV/cm (b) for films on STO(001) (solid symbols) and Si(001) (empty symbols).

### S6: The polarization loops after different cycling

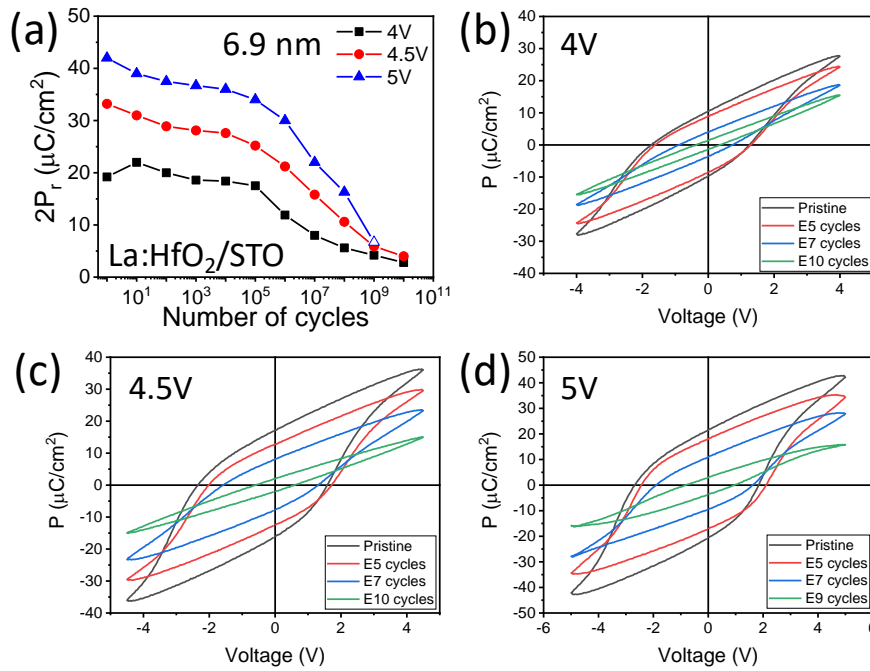

**Figure S6.** (a) Endurance measurements of the  $t = 6.9$  nm La:HfO<sub>2</sub> film on STO(001). polarization loops after a number of bipolar cycles of amplitude 4V (b), 4.5 V (c) and 5 V (d).

### S7: Normalized polarization of $t = 6.9$ nm film on STO(001) as a function of the number of cycles

Figure S7 shows the endurance of  $t = 6.9$  nm La:HfO<sub>2</sub> film on STO(001) for applied bipolar pulses of different amplitude. Each endurance measurement is plotted with the remanent polarization normalized to the corresponding maximum  $P_r$ . It can be seen that the decreasing rate of  $P_r$  is very similar under each poling voltage (4 V, 4.5 V, 5 V). Thus, the amplitude of the electric field has nearly no impact on the fatigue. However, the higher voltage promotes breakdown.

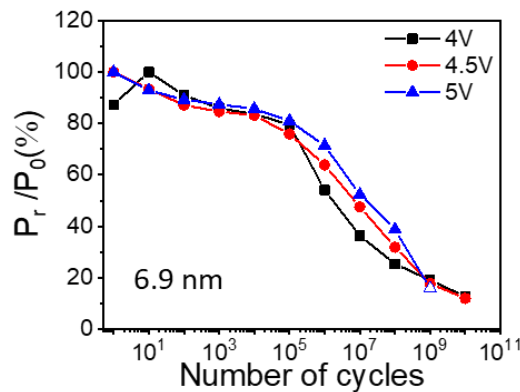

**Figure S7.** Endurance of the  $t = 6.9$  nm film after different cycling. The data after cycling are normalized to the maximum  $P_r$  under each voltage. Open symbol indicates breakdown.

## S8: Endurance measurement under different cycling frequency

The La:HfO<sub>2</sub> films on STO(001) were measured under different frequency. With frequency increase, fatigue is reduced and endurance is longer.

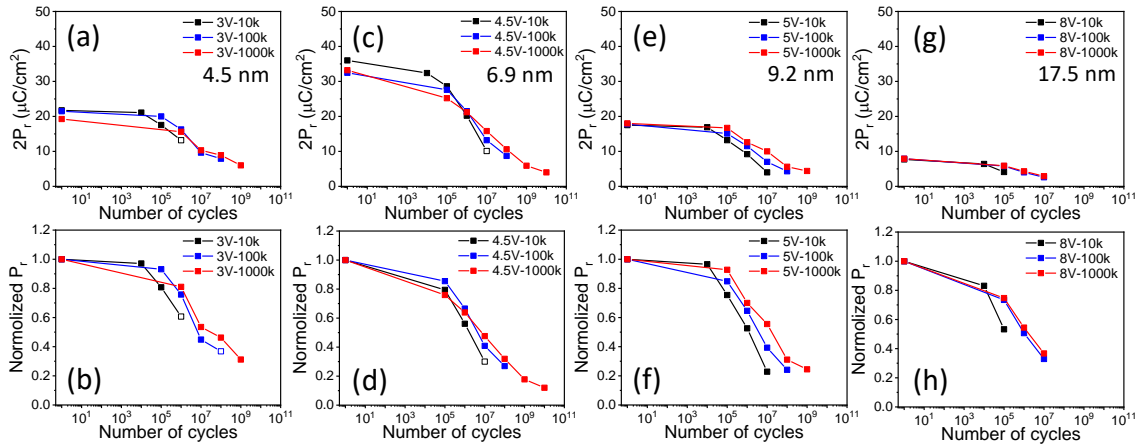

**Figure S8.** Memory window and normalized polarization of La:HfO<sub>2</sub> on STO(001) films as a function of the number of cycles. Capacitors were cycled at a frequency of 10k (black squares), 100k (blue squares) and 1000k (red squares). The film thickness is (a-b) 4.5 nm, (c-d) 6.9 nm, (e-f) 9.2 nm, (g-h) 17.5 nm. The polarization values are normalized to the maximum  $P_r$  under each frequency. Open symbols indicate breakdown.

## S9: Endurance and retention of 6.9 nm film on Si(001)

The wake-up effect of the 6.9 nm film on Si(001) is small and limited to a very few cycles, with  $P_r$  increasing from 32.4 to 34.1  $\mu\text{C}/\text{cm}^2$ . Then, the  $P_r$  gradually decrease with cycling, being  $2P_r = 5.2 \mu\text{C}/\text{cm}^2$  after  $5 \times 10^9$  cycles without breakdown. The film also exhibits excellent retention after being poling with the same electric field used to determine the endurance.

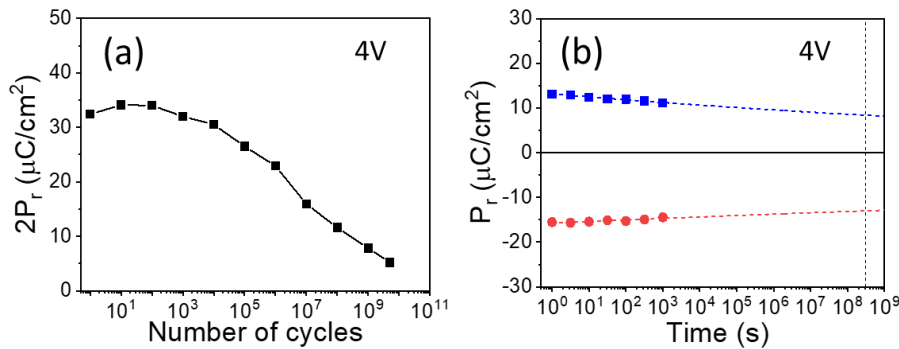

**Figure S9.** Endurance (a) and (b) retention of the La:HfO<sub>2</sub> 6.9 nm film on Si(001).

## References

- 1 L. L. Tao, T. R. Paudel, A. A. Kovalev and E. Y. Tsymbal, *Phys. Rev. B*, 2017, **95**, 1.
- 2 S. Estandía, N. Dix, M. F. Chisholm, I. Fina and F. Sánchez, *Cryst. Growth Des.*,



2020, **20**, 3801.

- 3 M. C. Sulzbach, S. Estandía, X. Long, J. Lyu, N. Dix, J. Gàzquez, M. F. Chisholm, F. Sánchez, I. Fina and J. Fontcuberta, *Adv. Electron. Mater.*, 2020, **6**, 1900852.
